# Supplementary material for: Interplay of pericentromeric genome organization and chromatin landscape regulates the expression of Drosophila melanogaster heterochromatic genes
Source: PubMed Central journal article supplement (PMC7541242; doi:10.1186/s13072-020-00358-4), 2020-10-07
Supplement: 13072_2020_358_MOESM1_ESM.pdf [file 13072_2020_358_MOESM1_ESM.pdf]

## **Additional File 1: Supplementary Information**

### **Interplay of pericentromeric genome organization and chromatin landscape regulates the expression of *Drosophila melanogaster* heterochromatic genes**

Parna Saha<sup>1,2</sup>, Divya Tej Sowpati<sup>1</sup>, Mamilla Soujanya<sup>1,2</sup>, Ishanee Srivastava<sup>1</sup> and Rakesh Kumar Mishra\*<sup>1,2</sup>

<sup>1</sup>CSIR- Centre for Cellular and Molecular Biology, Hyderabad-500007, India

<sup>2</sup>Academy of Scientific and Innovative Research (AcSIR), India

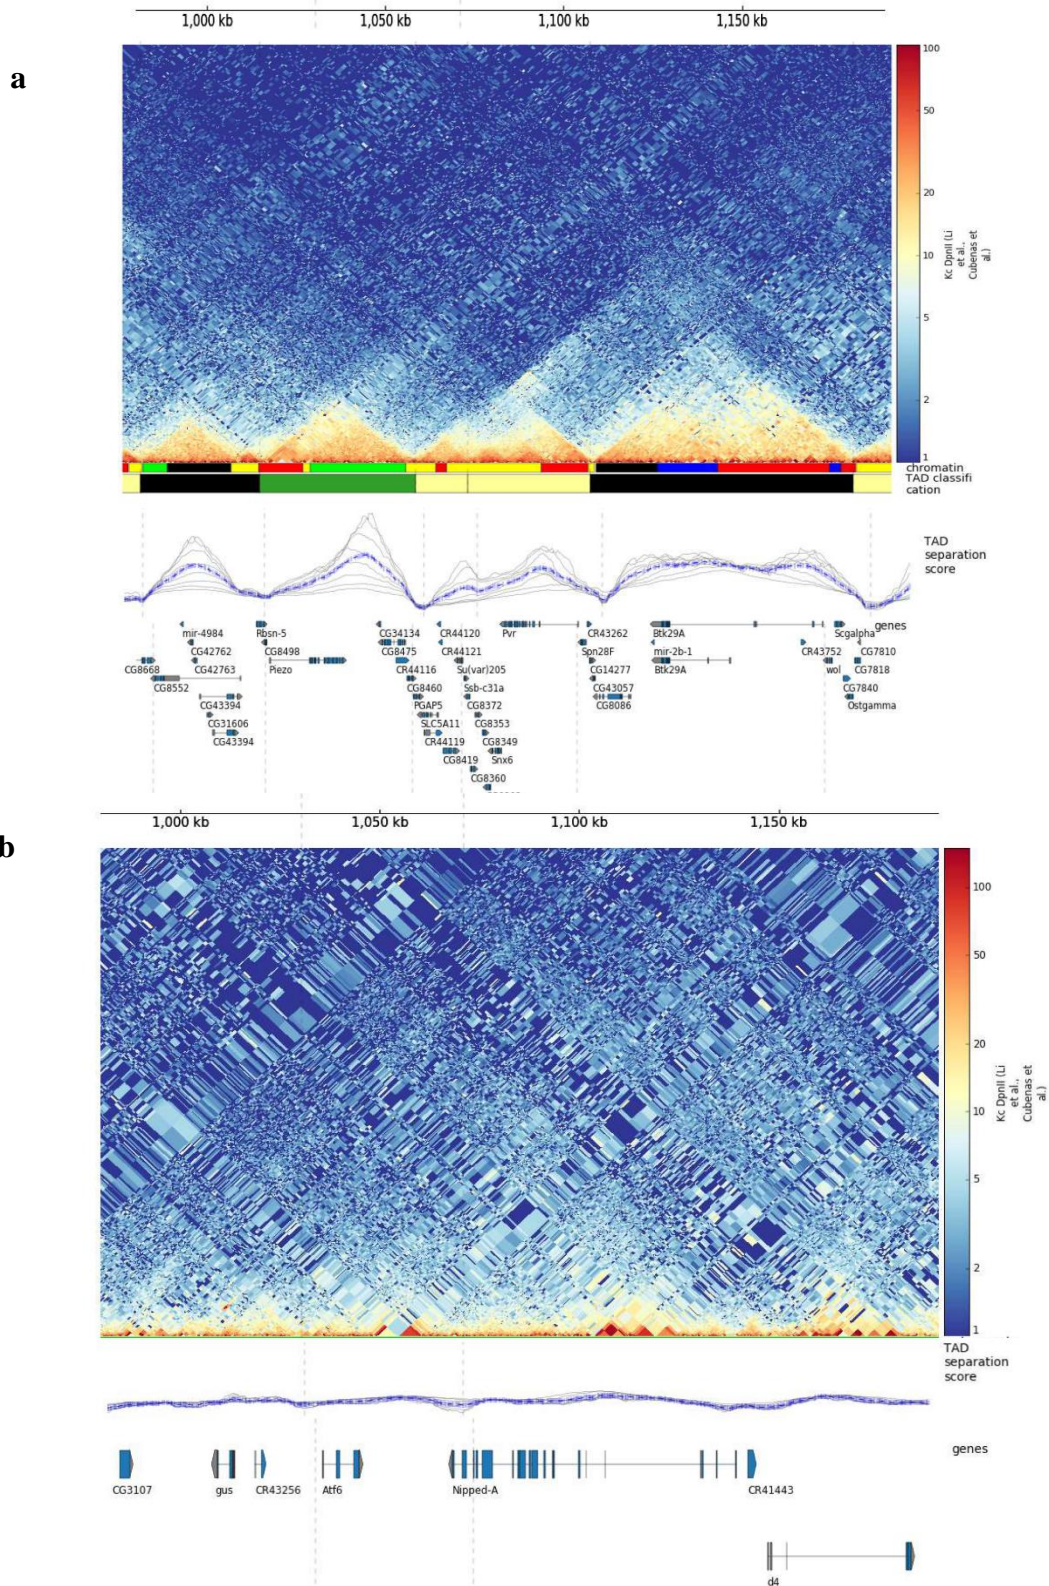

**Fig S1: Heterochromatic regions lack sufficient information about the pericentromeric genome organization-** **a)** Snapshot of an euchromatic gene, Su(var)205 gene (chr2L:8126001-8310427), showing the TAD structure (Hi-C data for Kc167 cells [Li *et al* & Cubentas *et al*]), followed by the TAD separation score, which is inversely correlated with the insulation index between adjacent TADs. **b)** Snapshot for a heterochromatic gene, Nipped A (chr2R:982668-1188470) shows limited information about the TAD structure, in the publicly available dataset. The figures are generated using Chorogenome Navigator (<http://chorogenome.ie-freiburg.mpg.de>).

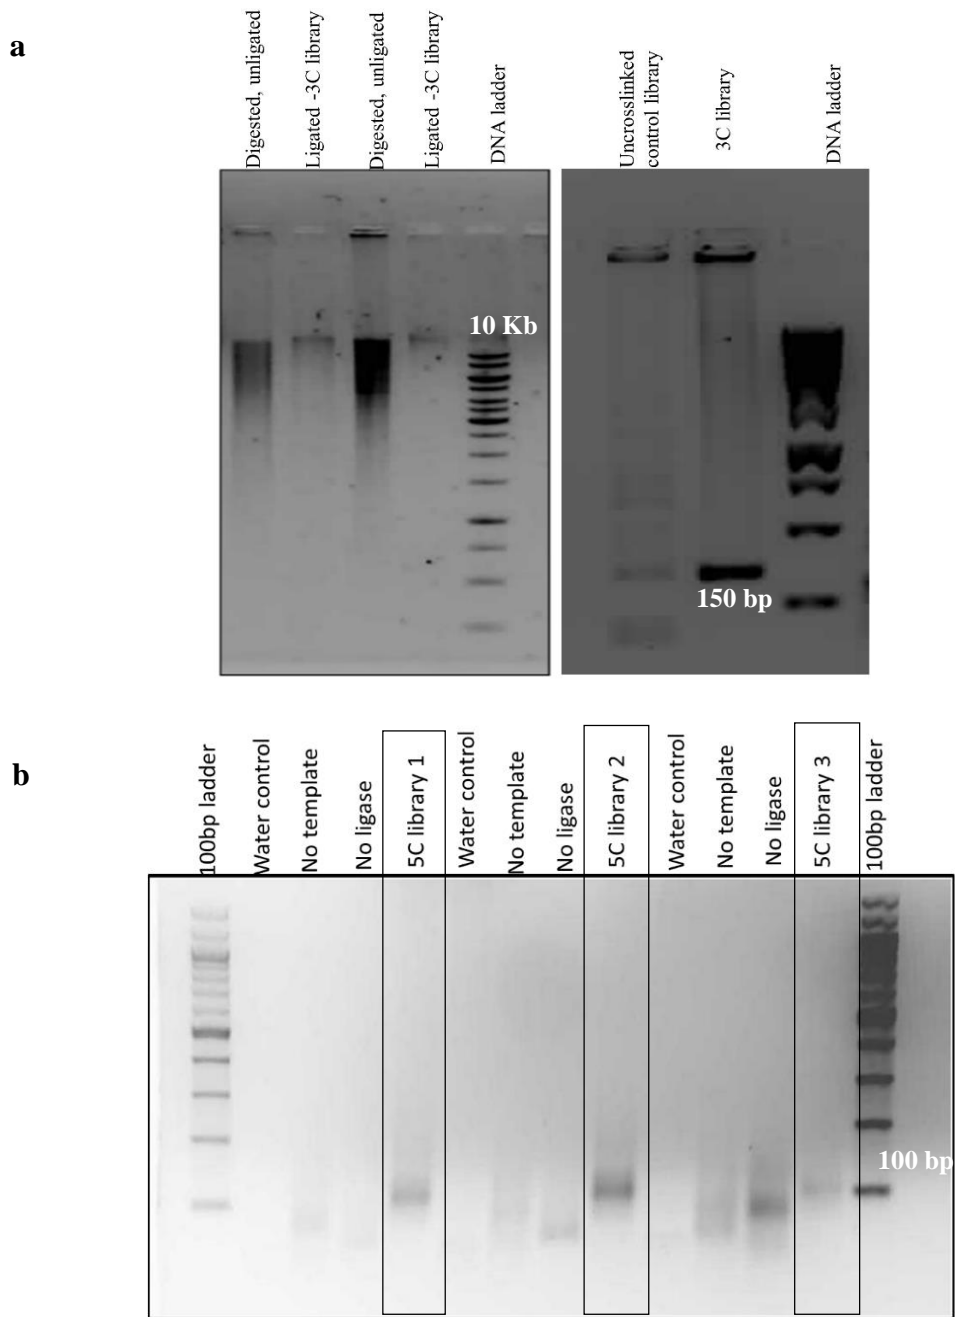

**Fig S2: Quality controls for 3C and 5C libraries** **a)** Agarose gel images showing the 3C chromatin which runs as a smear but retracts to a tight band that runs above 10kb upon successful ligation. Second gel image- PCR with positive control primers (Li, H.B *et al*, PLoS Genet. 2013), the control 3C library gives multiple bands as opposed to the single prominent product of 150 bp for the 3C library. This indicates that the 3C library preparation is good and has the representation of the already reported interactions. **b)** Agarose gel image of the 5C PCR reactions of 3C template with no template, no ligase, no primer controls. The 5C library is 100bp in size as the primers are 50 bp each (30 bp complementary to sequence adjacent to the EcoRI sites, including half of the EcoRI site and 20 bp for the T7/3 overhangs).

## chr2L

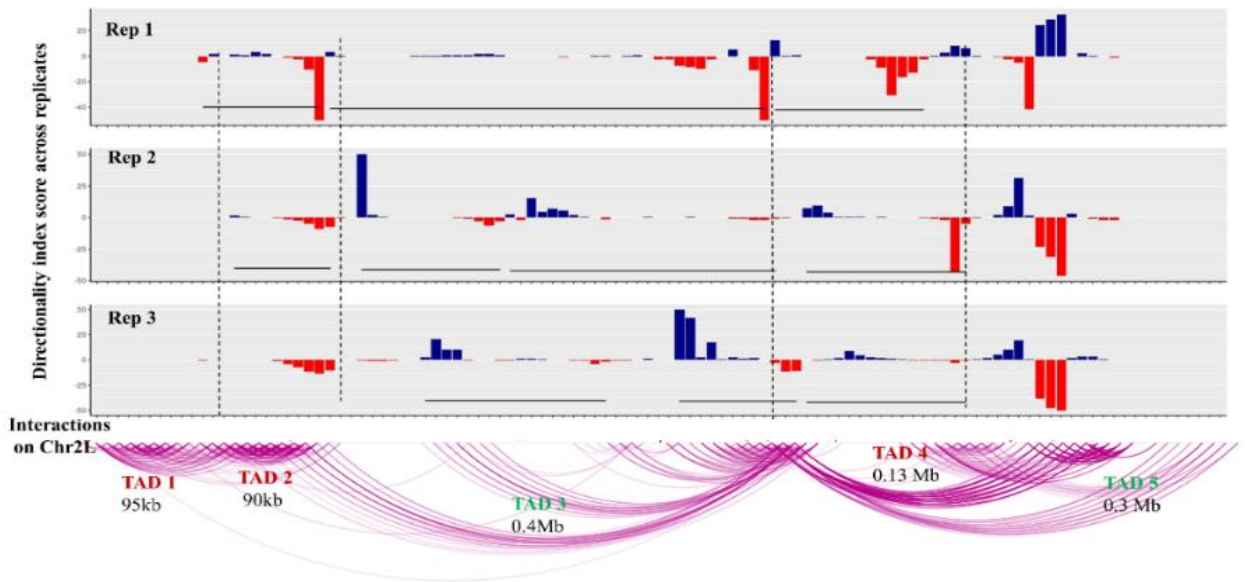

## chr2R

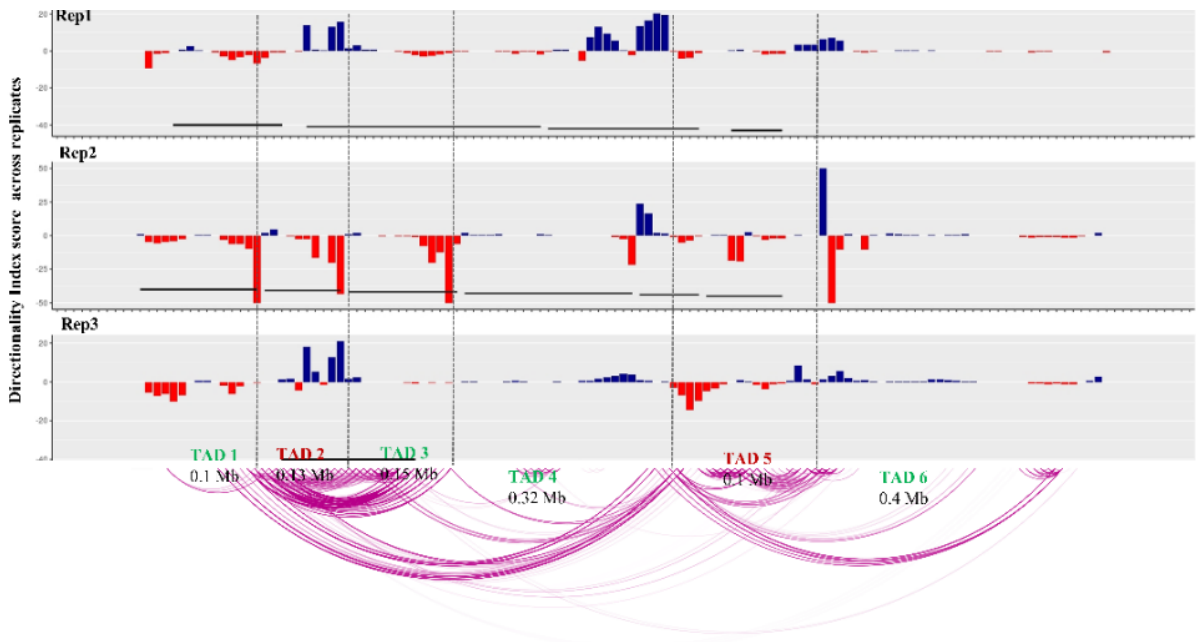

**Fig S3: Directionality index plots-** for chr 2L, 2R, 3L and X, used to call the consensus TADs across 3 replicates.

## chr3L

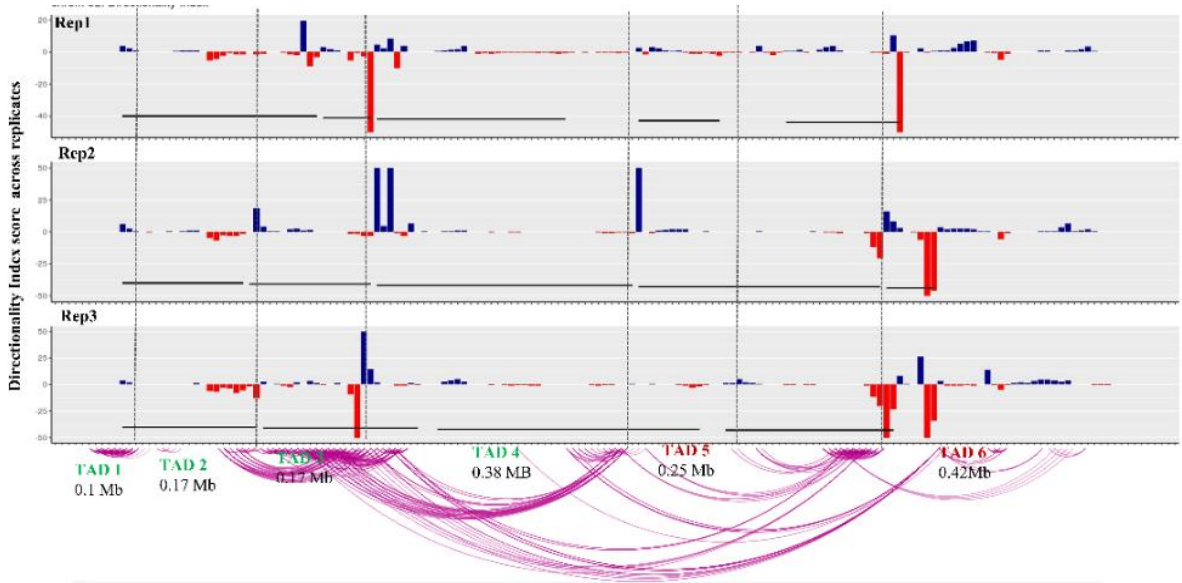

## chr X

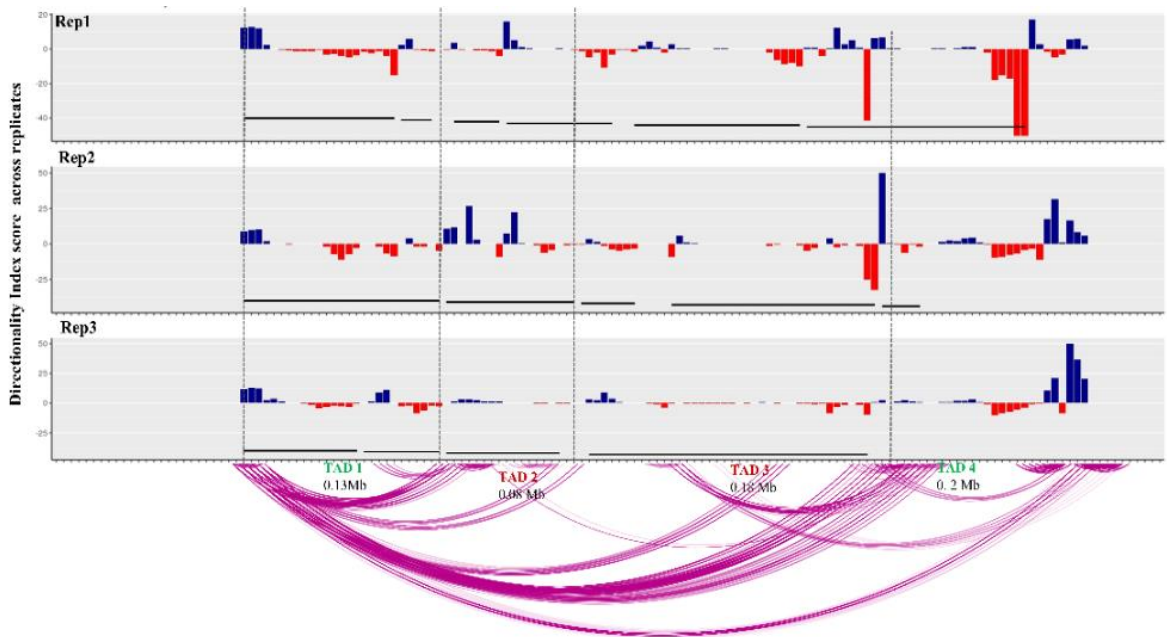

**Fig S3: Directionality index plots-** for chr 2L, 2R, 3L and X, used to call the consensus TADs across 3 replicates.

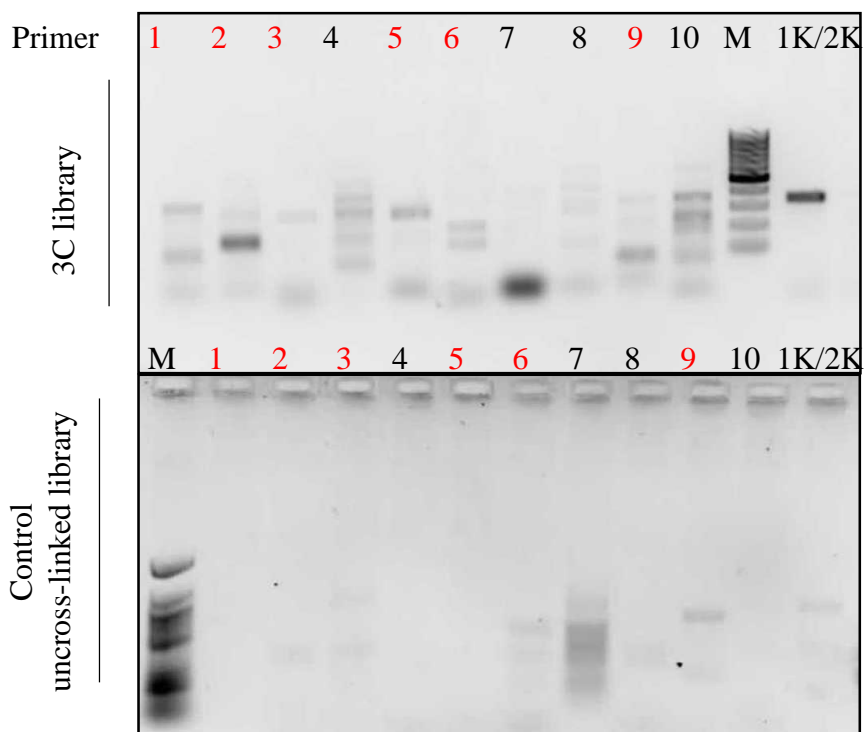

**Fig S4: Validation of 5C seq interaction-** Agarose gel image showing the validation of candidate 5C interactions reported by 5C seq across chromosome arms using 3C library (has amplification) and control un-crosslinked library (no amplification). 1K/2K are positive control primers -pointing in same direction and adjacent EcoRI sites near *Brk* gene in euchromatin that can only amplify from crosslinked 3C junctions (taken from Li HB *et al*; MCB, 2011). For primers, see Table 3. Each interaction is denoted by a primer pair and the corresponding number of the forward and reverse primer pair number from the 5C primer pool is included. Primers pairs in red are the validated examples.



### c chrX

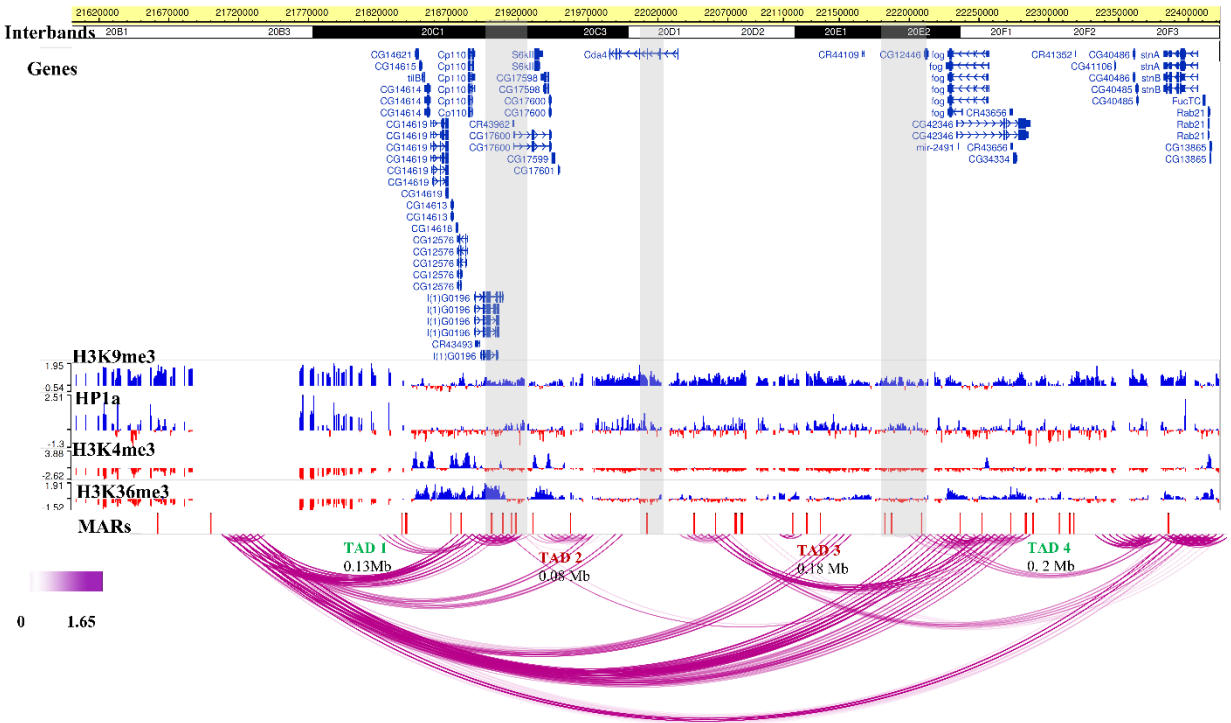

### d chr3R

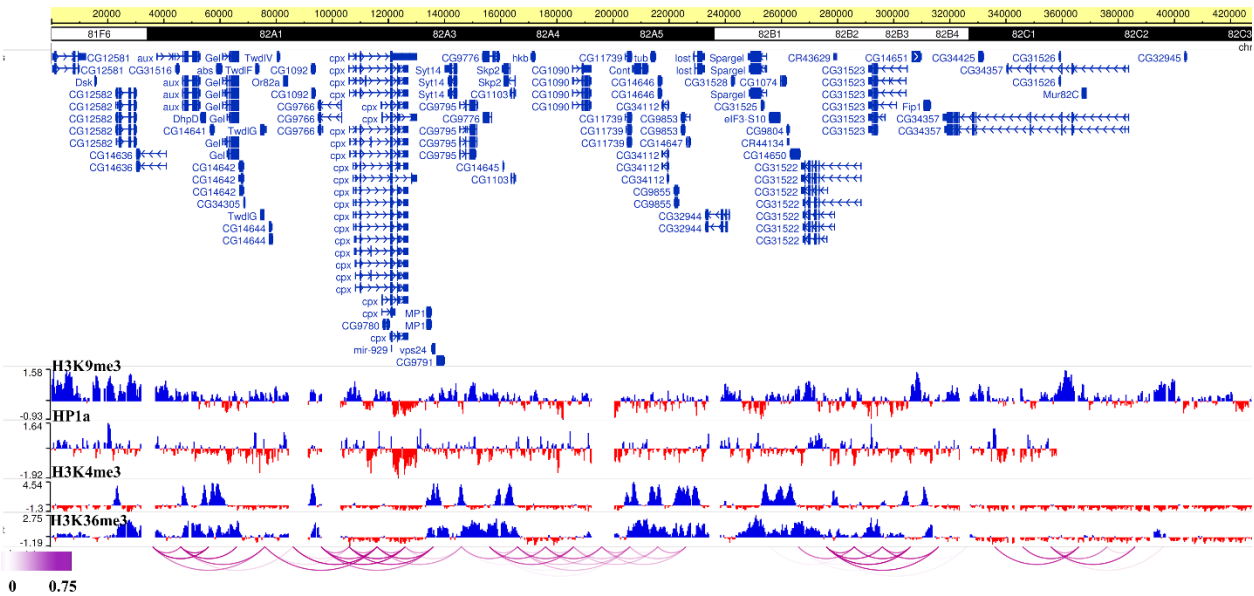

**Fig S5: 5C interaction maps-** showing the domains and subdomains mapped the pericentromeric regions of **c) chrX d) chr3R** along with the Refseq genes, distributions of H3K9me3, HP1a on heterochromatic genes and H3K4me3 and H3K36me3 marks to indicate the epigenetic state of the domains. TAD colored green and red to indicate active and repressed TADs respectively and sizes are indicated. TAD borders are indicated by grey bars. See Table 1 for the coordinates of TADs and TAD borders.



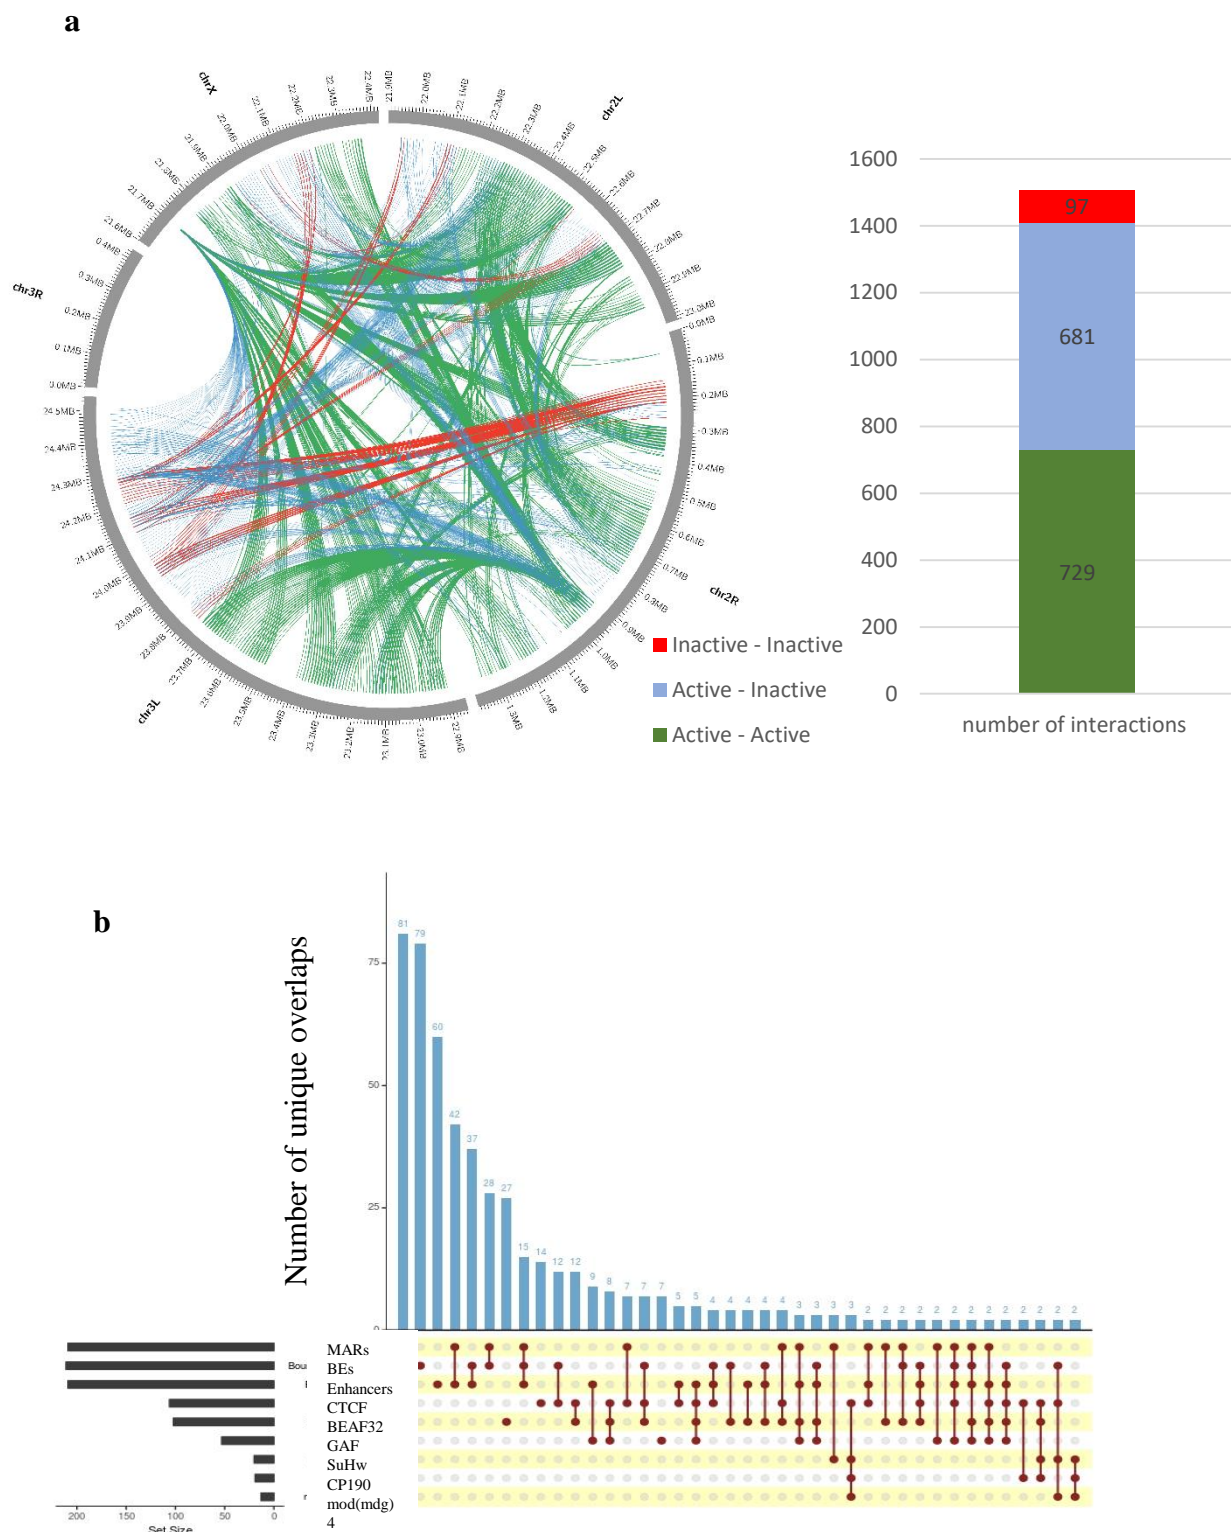

**Fig S6: Inter-chromosomal interactions within the Het Regions-** **a)** Circos plot showing the distribution of inter-chromosomal interactions across active and inactive Het TADs mapped on the chromosome arms. **b)** Overlap of inter-chromosomal interacting regions with various genomic features. Number of overlaps indicated on top of the blue bars and number of genomic features overlapped shown in black bars. Red connected dots show the combination of genomic features that overlap with any interacting regions.

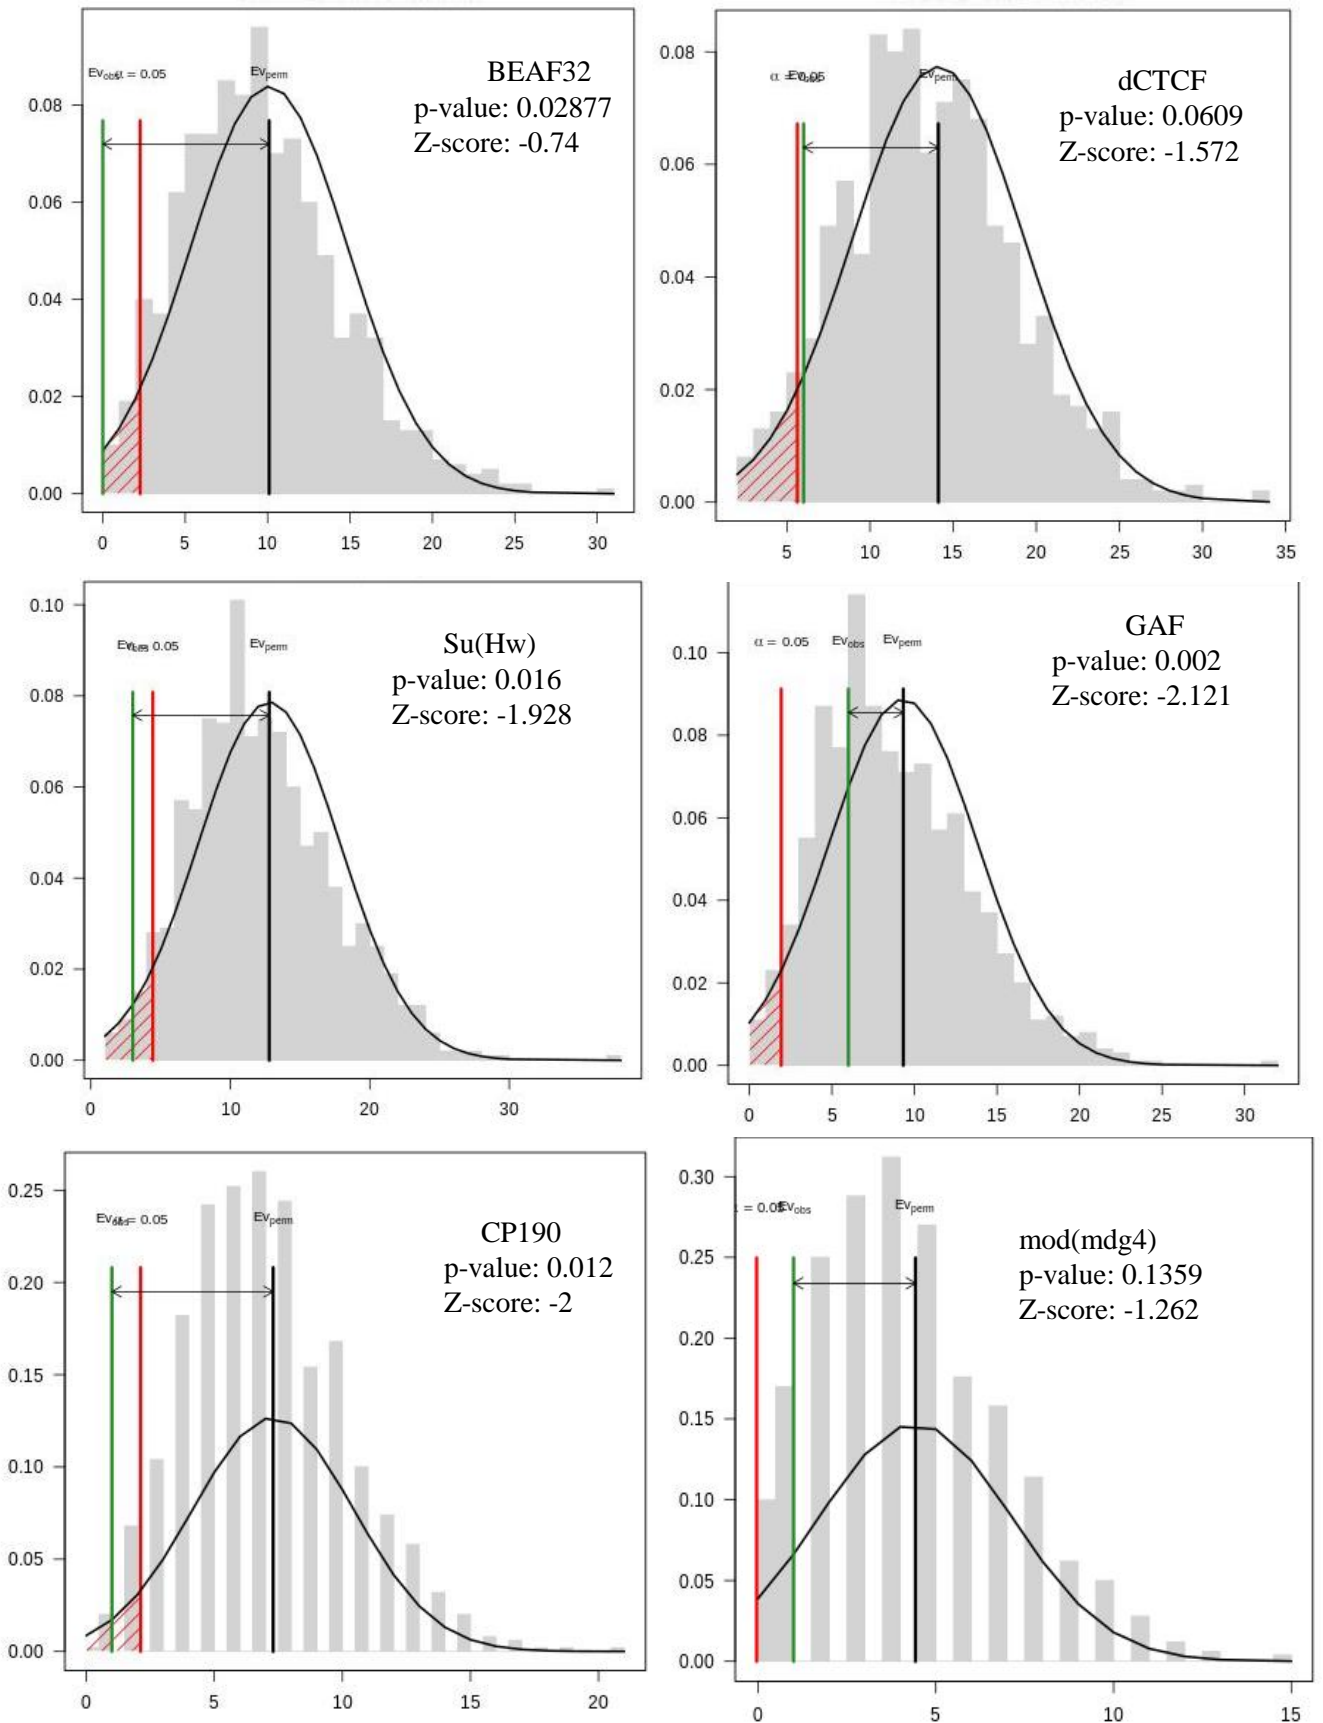

**Fig S7: Overlap permutation statistical test for overlap of Het TAD borders with binding sites of various architectural/ insulator proteins** – Higher significance of overlap is assigned by low p-value and high Z-score. BEAF32 is enriched at the TAD borders while GAF and mod(mdg4) at the intra TAD regions. dCTCF, CP190 and Su(Hw) are present at the TAD borders but comparable to intra TAD regions. See Fig 2A for the comparative distribution across TADs and TAD borders.  $n_{perm} = 1000$ ; Y axis – number of overlaps.

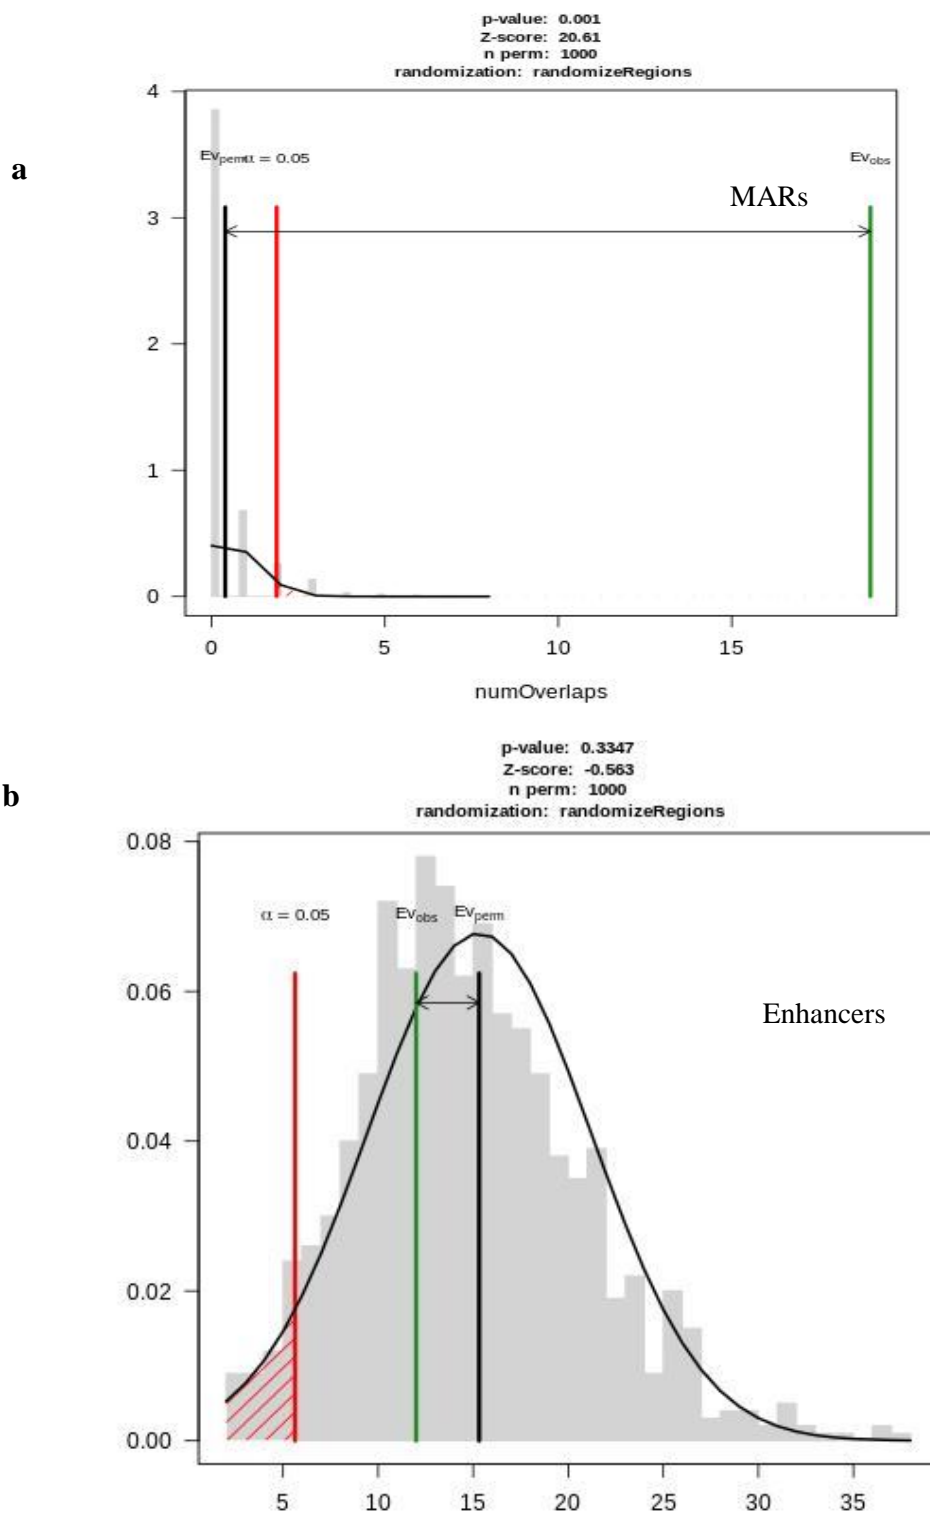

**Fig S8: Overlap Het TAD borders with genomic features-** Overlap permutation test showing the overlap of TAD borders/inter-TAD regions with various features. In this pictorial representation, the gray histogram represents the number of overlaps of randomized set of regions with the sequence feature (MARs or enhancers in this case) and the black bar denotes the mean. In green is the overlap of the sequence feature with the test regions (TAD borders), which if larger than the randomized regions, the overlap with the test regions is significant. Red bar denotes the significance limit set at  $P < 0.05$ . z-score measures the strength of the overlap irrespective of the number of permutations. High z-score and low p value indicates significant association. **a)** Overlap permutation test showing the overlap of TAD borders/inter-TAD regions the MARs is highly significant as compared to the **b)** STARR seq enhancers ( $p = 0.3347$ ) indicating promoter- enhancer interactions are likely to encompassed within the TADs

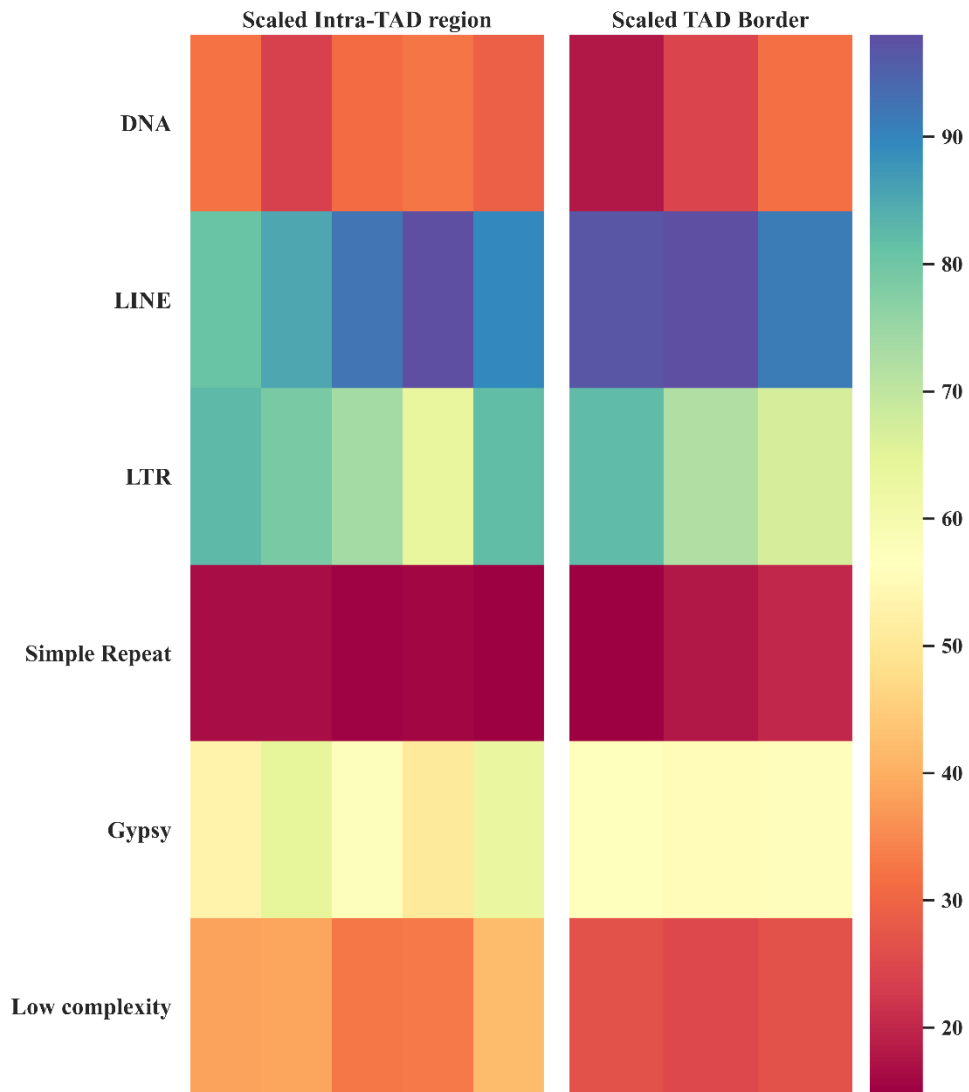

**Fig S9: Het TADs and repeats:** Overlap of the intra-TAD and TAD border regions with various repeat elements- shows comparable enrichment at the intra TAD regions and TAD borders.

## a chr2R

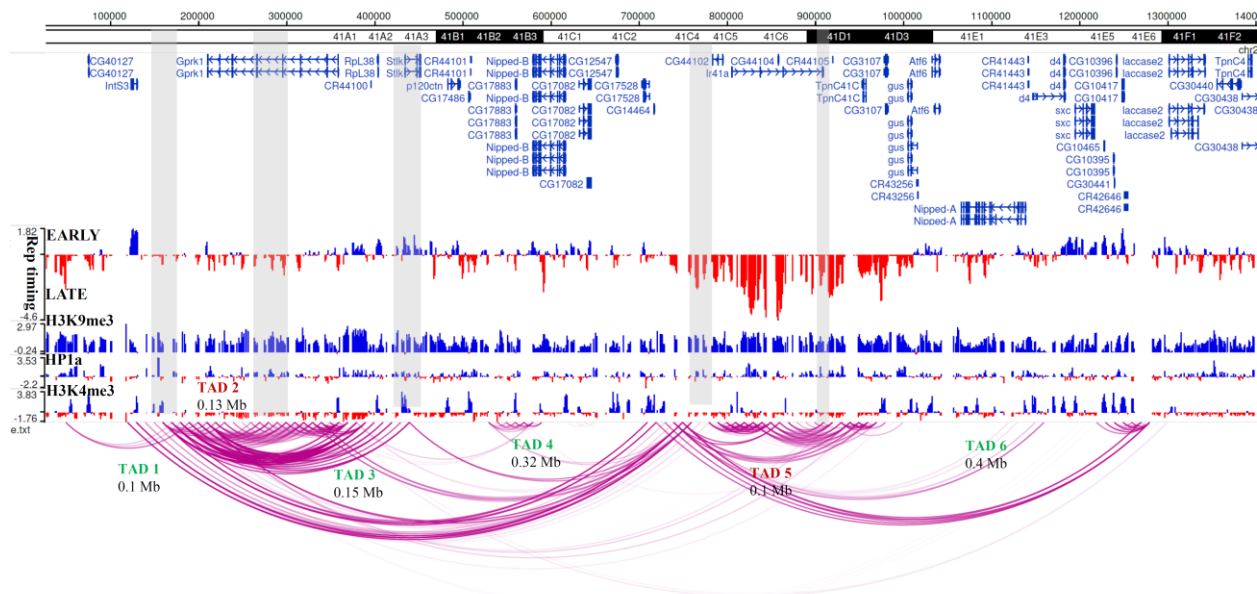

## b chr3L

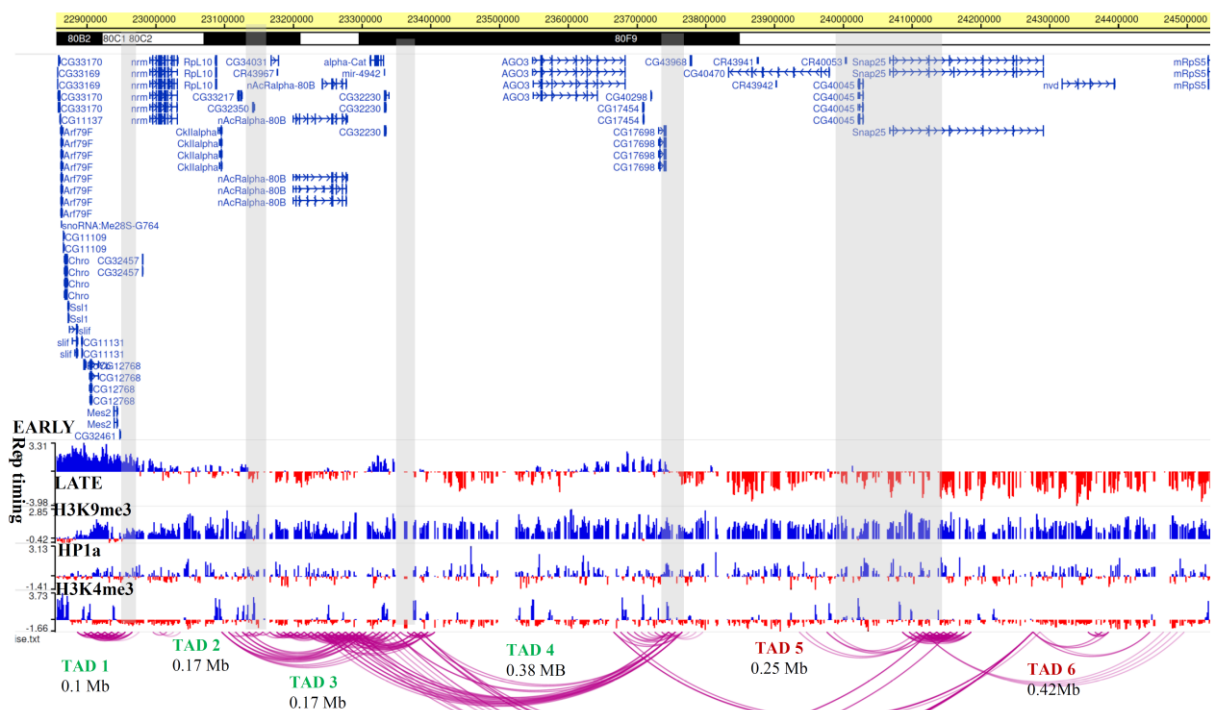

**Fig S10: Overlaps of Het TADs with the replication timing domains in the pericentromeric regions-** Active Het TADs are generally enriched for early replicating regions. Overlay of the replication timing data with long-range interactions in **a) chr2R b) chr3L**. Grey bars indicate TAD borders.

### c chrX

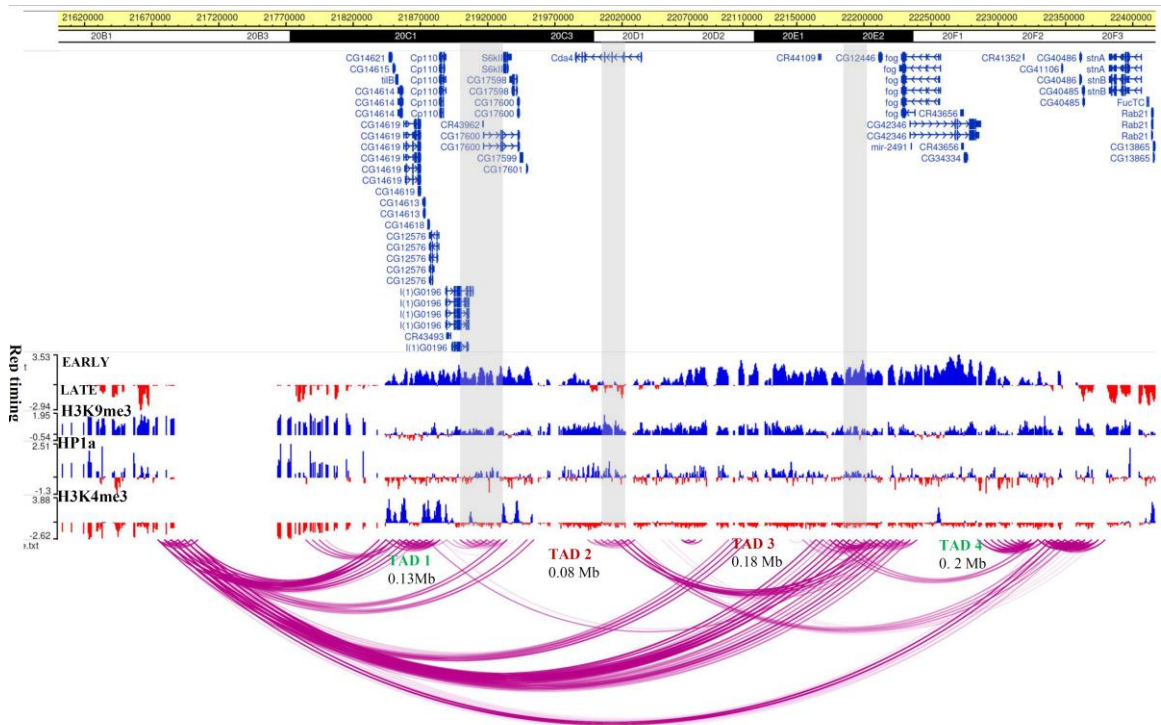

**Fig S10: Overlaps of Het TADs with the replication timing domains in the pericentromeric regions-** Active Het TADs are generally enriched for early replicating regions. Overlay of the replication timing data with long-range interactions in c) chrX. Grey bars indicate TAD borders.

### a chr2L

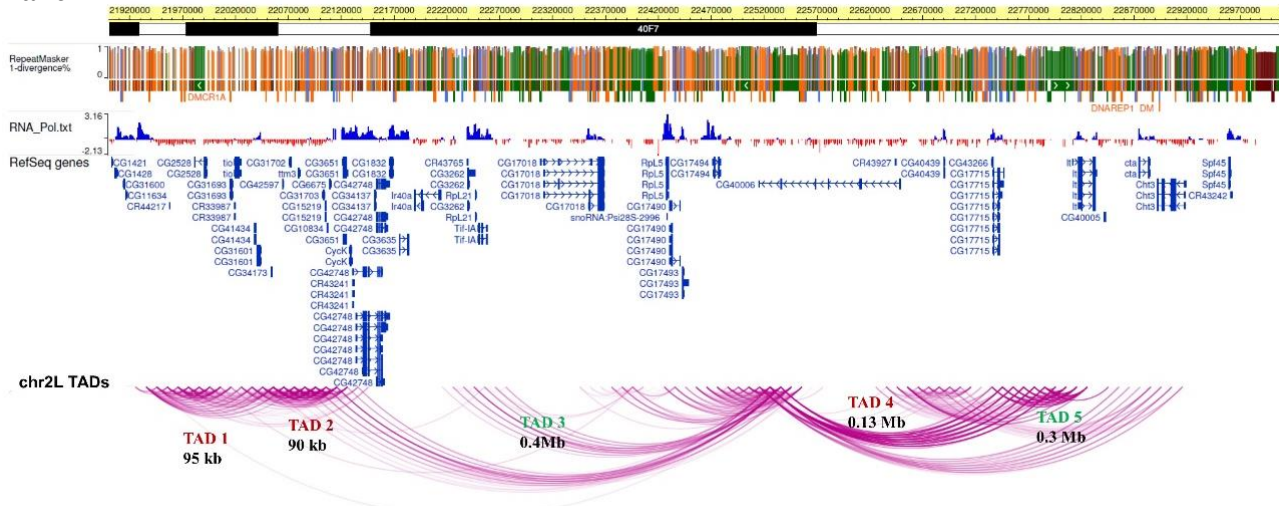

### b chr2R

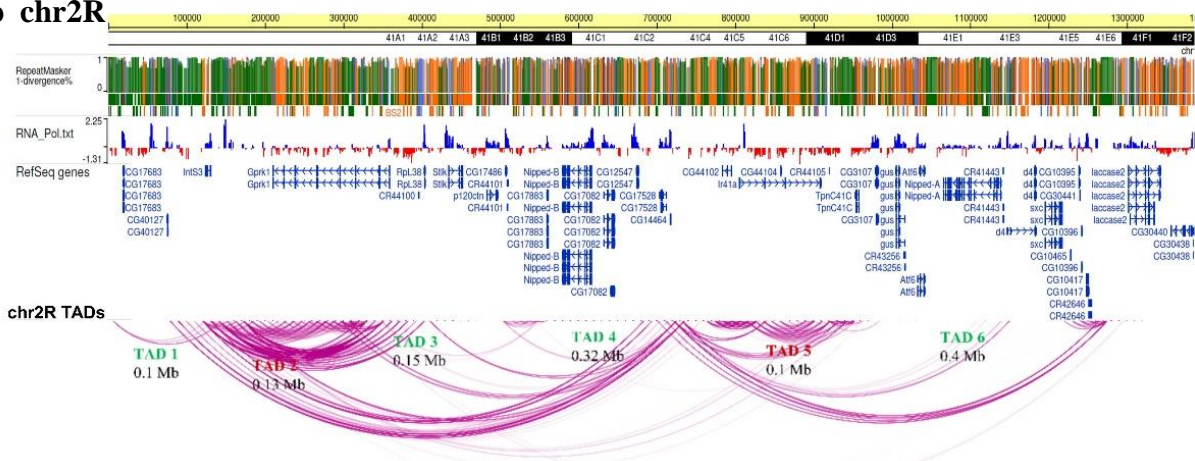

### c chr3L

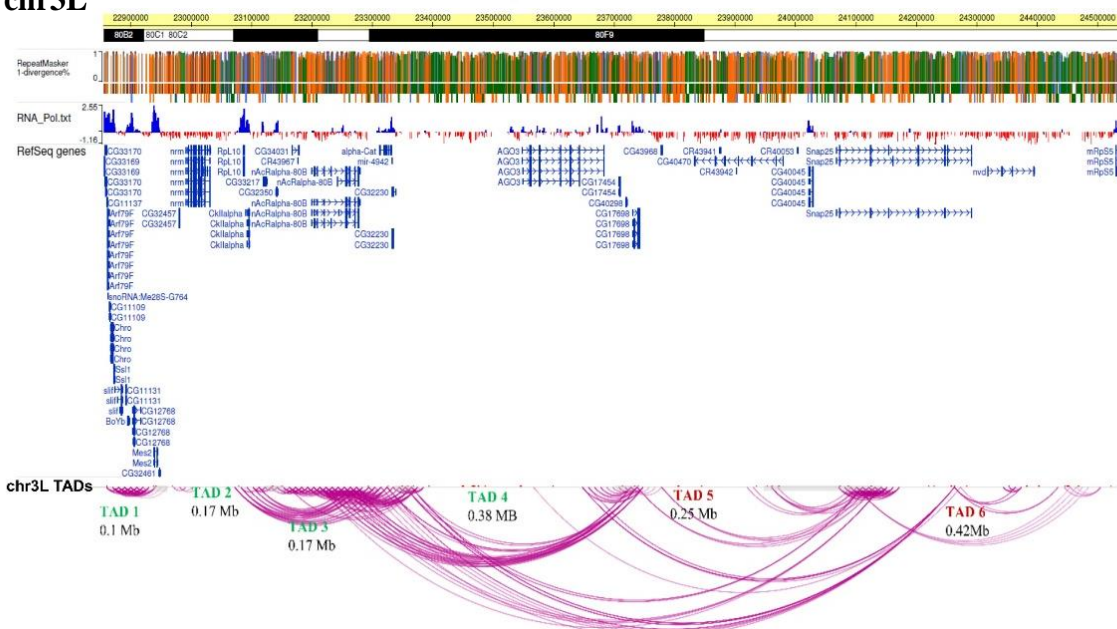

**Fig S11: Overlaps of Het TADs with the RNA Pol II ChIP peaks in the pericentromeric regions- a) chr2L, b) chr2R, c) chr3L**

## d chrX

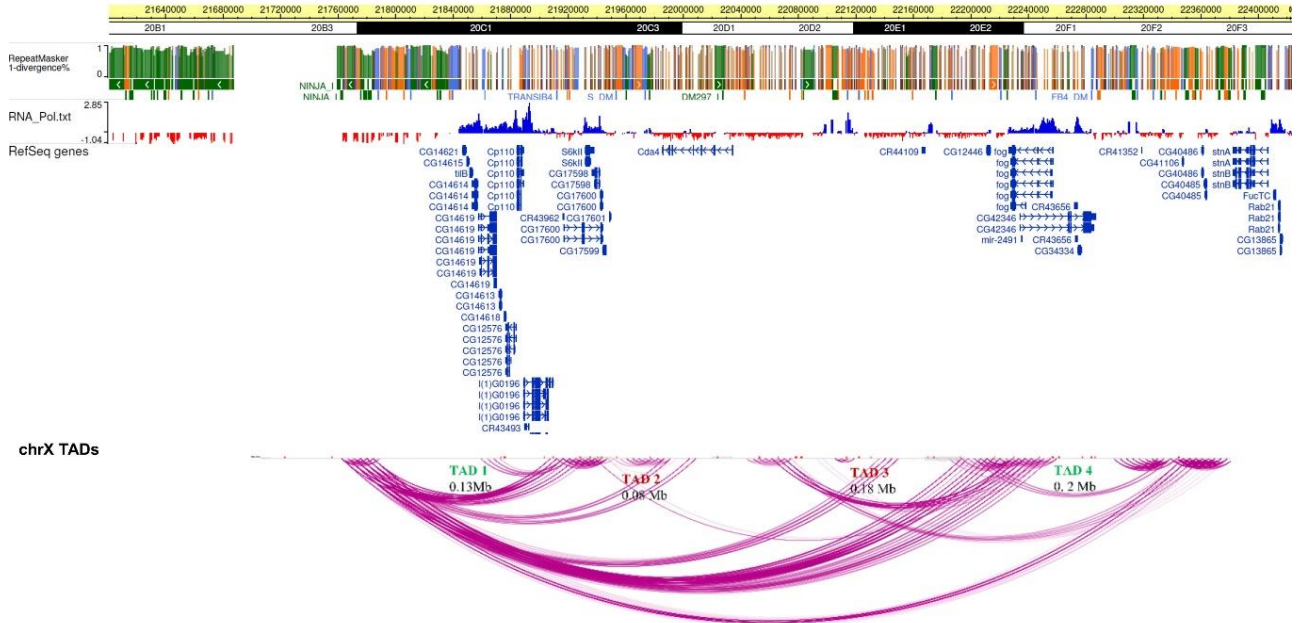

**Fig S11: Overlaps of Het TADs with the RNA Pol II ChIP peaks in the pericentromeric regions- d) Chr X**

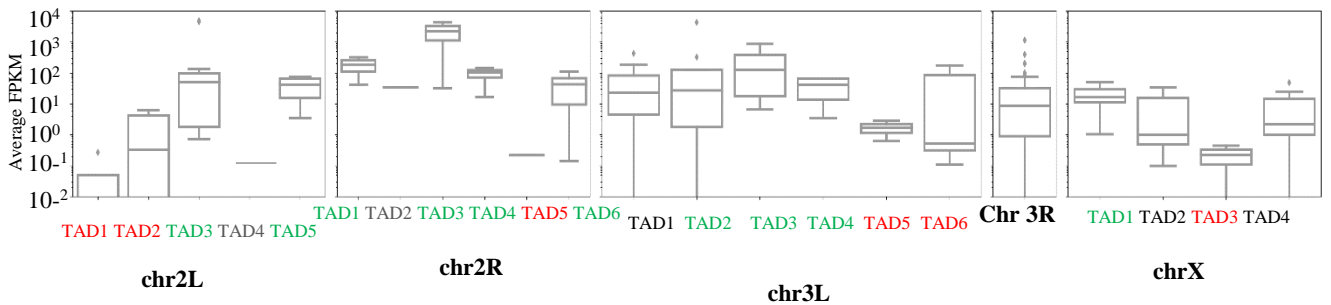

**Fig S12: Correlation of Het TAD with expression levels of heterochromatic genes-** The expression values of the genes within each TAD on each chromosome plotted as boxplots of average FPKM values. Narrow range of gene expression within a TAD indicate TADs with similarly expressing genes whereas the broad range indicate the TAD encompasses genes with varying expression levels. TADs with most genes with FPKM values  $< 10^0$  are inactive. Inactive TADs are marked in red and active in green. Few TADs have genes with wide range of expression levels marked in black (chr3L TAD1, chrX TAD 2 and 4) or genes largely into spanning adjacent TADs (*CG40046* in chr2L TAD4 and *Gprk1* in chr2R TAD 2). chr3R has genes of varying expression levels.



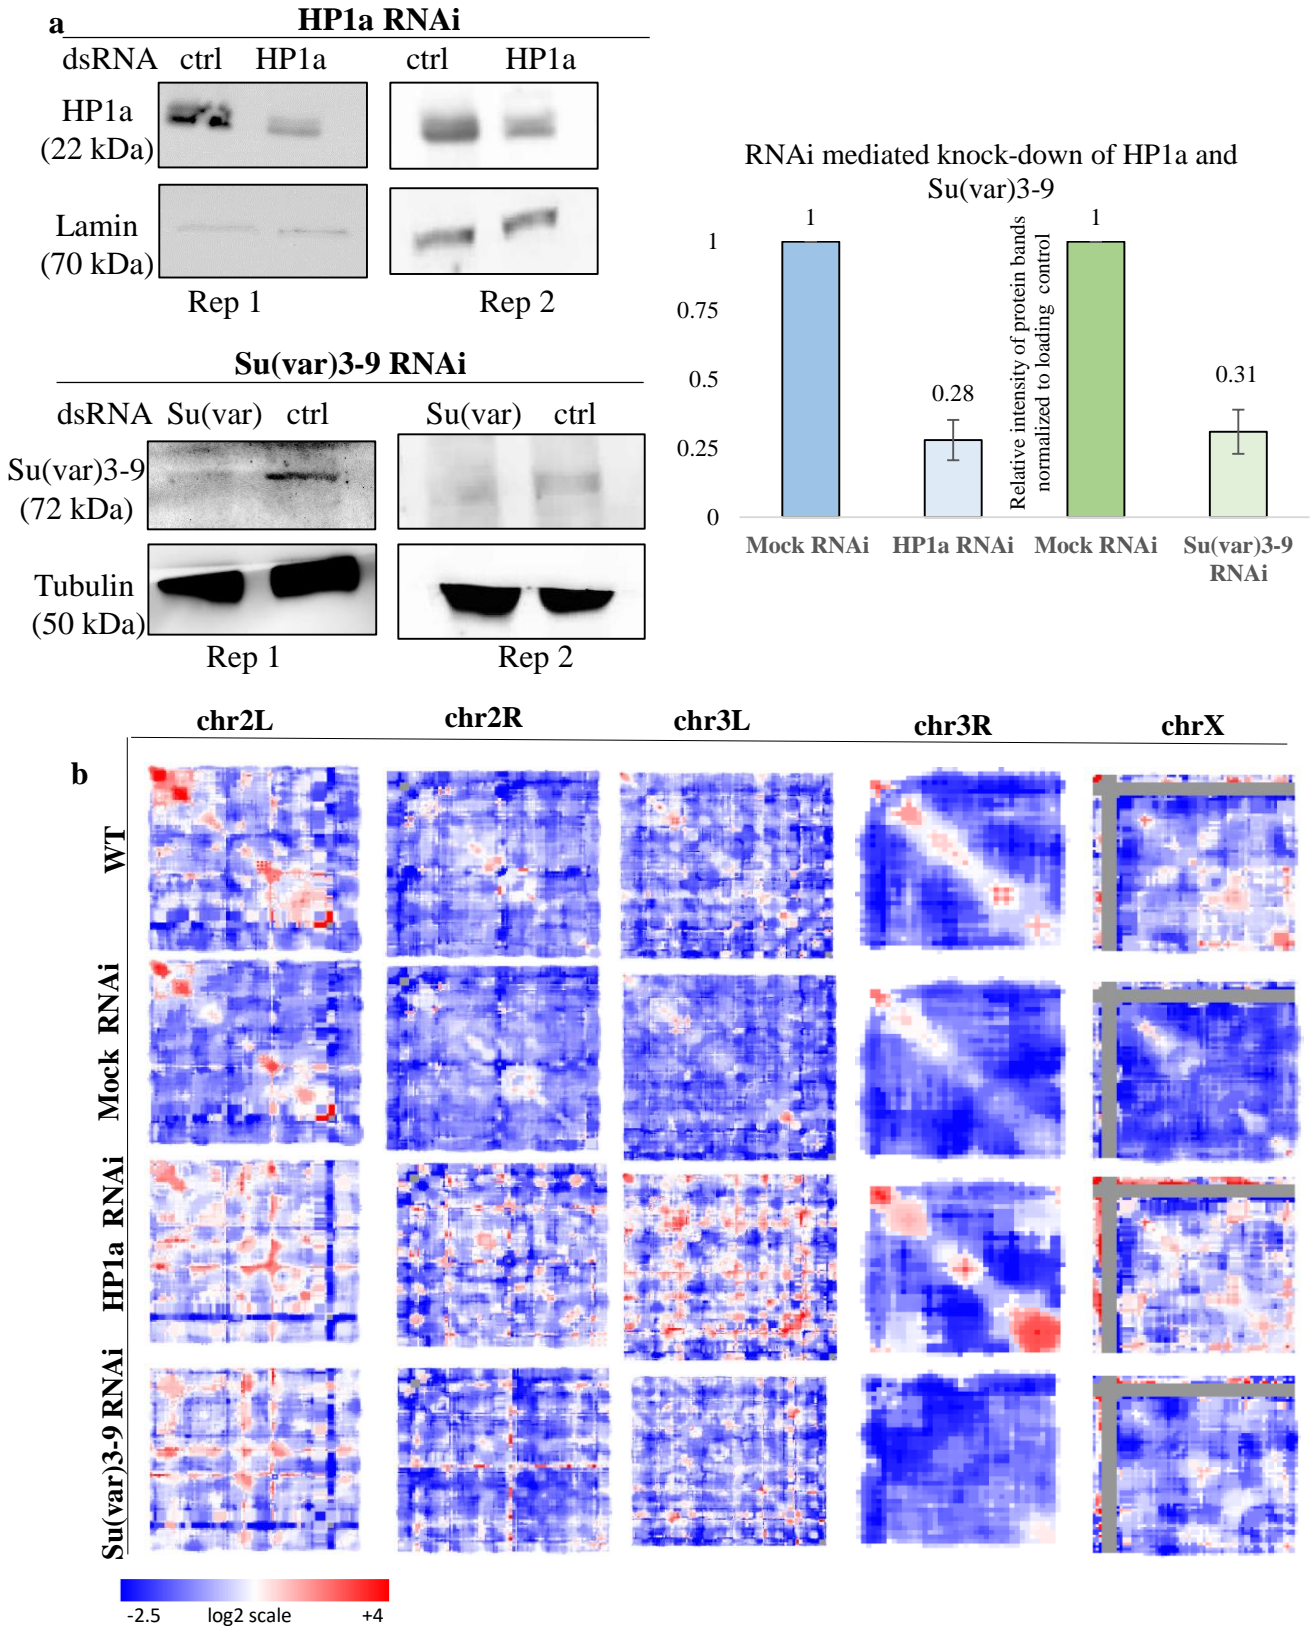

**Fig S13: RNAi mediated depletion of HP1a and Su(var)3-9 and effect on genome organization- a** Immunoblot showing the knock-down of HP1a and Su(var)3-9 in S2 cells (n=2) using dsRNA mediated RNA interference and quantitative analysis. **b** Heatmap for 5 chromosome arms in WT, Mock GFP RNAi, HP1a RNAi and Su(var)3-9 RNAi treated S2 cells. There is an increase in longer range DNA interactions across the diagonal and also on either side of it, indicating inter TAD interactions.

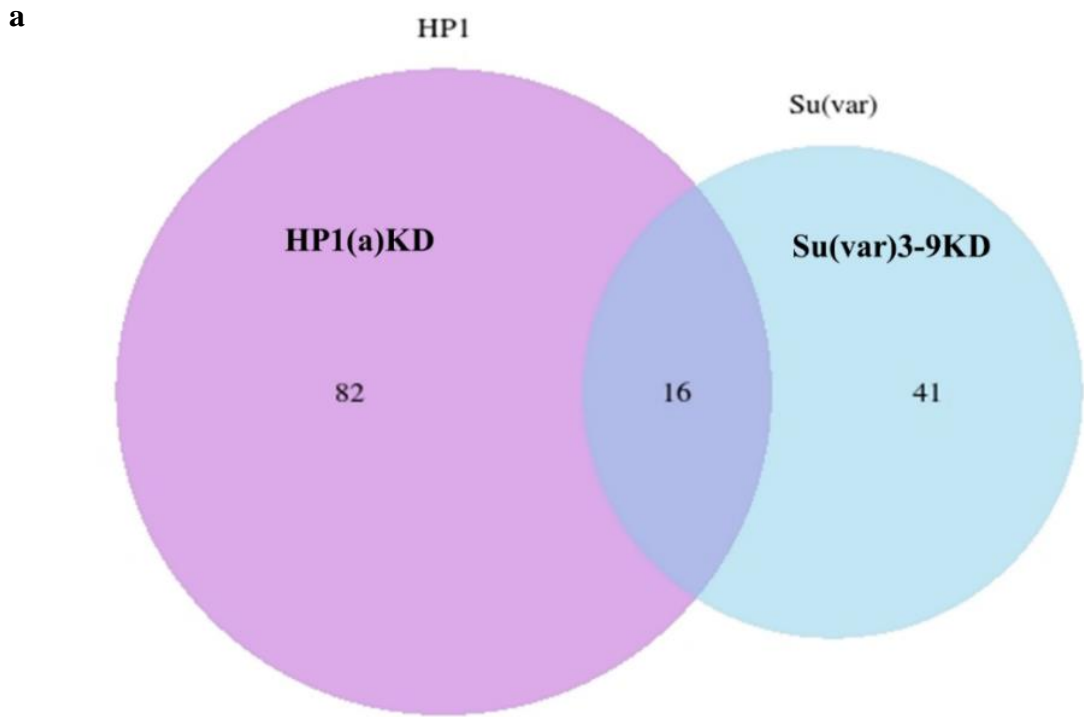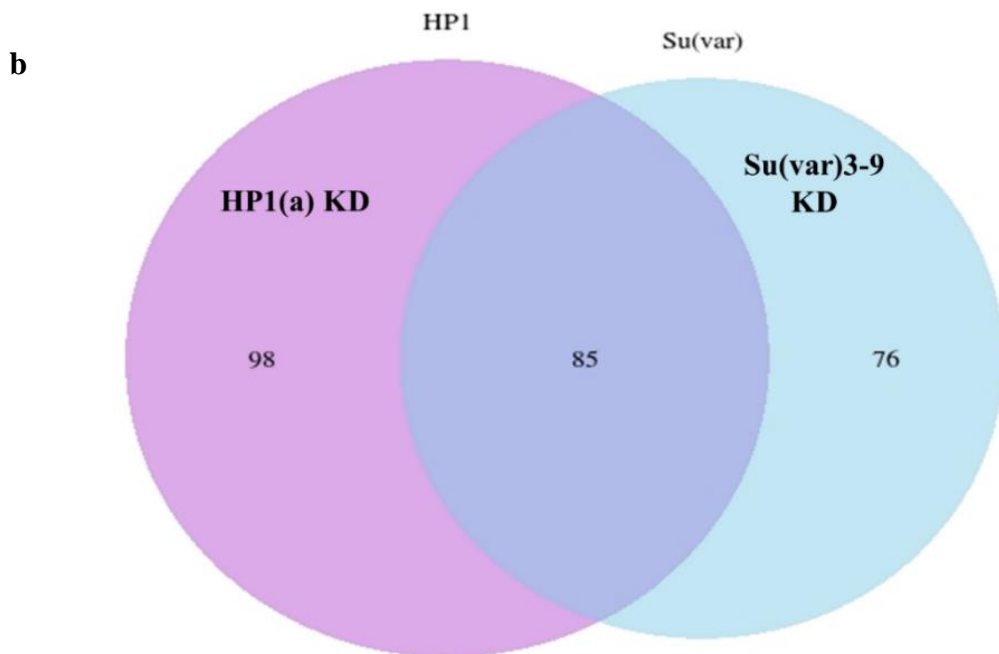

**Fig S14: Effects of RNAi mediated depletion of HP1a or Su(var)3-9 on genome-wide transcriptome** - Venn diagram showing the number of genes **a)** upregulated and **b)** down-regulated in HP1a and Su(var)3-9 knockdown conditions and the common between the two sets across the entire S2 cell transcriptome.

**Table 1: List of TAD and TAD boundary coordinates**

| Chr                                                                                                     | start    | end      | size (bp) | Chr                   | start    | end      | size (bp) |
|---------------------------------------------------------------------------------------------------------|----------|----------|-----------|-----------------------|----------|----------|-----------|
| <b>TADs</b>                                                                                             |          |          |           | <b>TAD boundaries</b> |          |          |           |
| chr2L                                                                                                   | 21900975 | 21996057 | 95082     | chr2L                 | 21996057 | 22016057 | 30000     |
| chr2L                                                                                                   | 22026057 | 22116057 | 90000     | chr2L                 | 22116057 | 22136057 | 20000     |
| chr2L                                                                                                   | 22136057 | 22536057 | 400000    | chr2L                 | 22536057 | 22556057 | 20000     |
| chr2L                                                                                                   | 22556057 | 22686057 | 130000    | chr2L                 | 22686057 | 22706057 | 20000     |
| chr2L                                                                                                   | 22706057 | 23011544 | 305487    |                       |          |          |           |
| chr2R                                                                                                   | 1        | 109746   | 109754    | chr2R                 | 109746   | 129746   | 20000     |
| chr2R                                                                                                   | 129746   | 259746   | 130000    | chr2R                 | 259746   | 299746   | 40000     |
| chr2R                                                                                                   | 299746   | 449746   | 150000    | chr2R                 | 449746   | 469746   | 20000     |
| chr2R                                                                                                   | 469746   | 789746   | 320000    | chr2R                 | 789746   | 799746   | 10000     |
| chr2R                                                                                                   | 799746   | 899746   | 100000    | chr2R                 | 889746   | 909776   | 10000     |
| chr2R                                                                                                   | 909776   | 1385689  | 475913    |                       |          |          |           |
| chr3L                                                                                                   | 22855576 | 22956370 | 100794    | chr3L                 | 22956370 | 22976370 | 20000     |
| chr3L                                                                                                   | 22976370 | 23146370 | 170000    | chr3L                 | 23146370 | 23166370 | 20000     |
| chr3L                                                                                                   | 23166370 | 23336370 | 170000    | chr3L                 | 23336370 | 23356370 | 20000     |
| chr3L                                                                                                   | 23356370 | 23736370 | 380000    | chr3L                 | 23736370 | 23756370 | 20000     |
| chr3L                                                                                                   | 23756370 | 24006370 | 250000    | chr3L                 | 24006370 | 24116370 | 110000    |
| chr3L                                                                                                   | 24116370 | 24543557 | 427187    |                       |          |          |           |
| chrX                                                                                                    | 21600796 | 21779812 | (seq gap) | chrX                  | 21779812 | 21789812 |           |
| chrX                                                                                                    | 21784812 | 21919812 | 135000    | chrX                  | 21914812 | 21924812 | 10000     |
| chrX                                                                                                    | 21924812 | 22004812 | 80000     | chrX                  | 22004812 | 22019812 | 10000     |
| chrX                                                                                                    | 22019812 | 22199812 | 180000    | chrX                  | 22199812 | 22209812 | 15000     |
| chrX                                                                                                    | 22209812 | 22422827 | 213015    |                       |          |          |           |
| Genes falling in TAD borders (low expression genes in grey)                                             |          |          |           |                       |          |          |           |
| 2L: <i>CG31693</i> , <i>CG3651</i> , <i>CG15218</i> , <i>CG40006</i> , <i>CG40439</i>                   |          |          |           |                       |          |          |           |
| 2R: <i>CG17665</i> , <i>CG40129</i> , <i>CG40293</i> , <i>CG41440</i> , <i>CG17704</i> , <i>CG33492</i> |          |          |           |                       |          |          |           |
| 3L: <i>CG32230</i> , <i>CG17698</i> , <i>CG40045</i> , <i>CG40452</i>                                   |          |          |           |                       |          |          |           |
| X: <i>CG17600</i> <i>CG32499</i>                                                                        |          |          |           |                       |          |          |           |

**Table 2a:** List of differentially expressed genes in HP1a or Su(var)3-9 RNAi conditions (p value < 0.05; Student two-sided T-test)

| HP1a RNAi           | Su(var)3-9 RNAi |
|---------------------|-----------------|
| CG11739             | CG14636         |
| stnB                | CG17159         |
| stnA                | CG34357         |
| CG12581             | CG40006         |
| CG14615             | CG41434         |
| I(1)G0196           | CG6675          |
| Usp2                | CG9780          |
| CG14636             | CR33294         |
| CG17514             | CR41501         |
| Dsk                 |                 |
| Cht3                |                 |
| CG31525             |                 |
| Ir41a               |                 |
| CG40006             |                 |
| CG40198             |                 |
| MFS17               |                 |
| Fog                 |                 |
| CG9780              |                 |
| CR41501             |                 |
| 18SrRNA-Psi:CR41602 |                 |

**Table 2b:** Average FPKM values of H3K9 methyltransferases in the RNAi conditions

| Gene              | WT (S2 cells) | HP1a RNAi | Su(var)RNAi |
|-------------------|---------------|-----------|-------------|
| <b>G9a</b>        | 6.24          | 7         | 7           |
| <b>Setdb1/egg</b> | 25.43         | 31        | 29          |

**Table 3:** List of primers

| <b>Primers for validating 5C interactions by 3C-PCR</b> |                                                |
|---------------------------------------------------------|------------------------------------------------|
| Primer name (chr –5Cprimer number) primer pairs         | Sequence (5'-3')                               |
| 2L For8_PP1                                             | CCTGCCATCAATAGTCCGAAA                          |
| 2L For99_PP1                                            | AGCCGTATCGTCCGTAAG                             |
| 2L For 113_PP2                                          | CAGGTAACCATGAAAGCAAAGTAA                       |
| 2L For209_PP2                                           | GCTTAACAGCTCTCGTTCAT                           |
| 2R For139_PP3                                           | CCGACTTCCCACAGAACAAA                           |
| 2R For251_PP3                                           | GAGCACGAAAGCATCAGAATTG                         |
| 2R For259_PP4                                           | CCTTCGGAATGTCATCCTCATT                         |
| 2R For270_PP4                                           | GCCAGAAGAGAGTACTGACAAA                         |
| 2R For280_PP5                                           | GGCTGACACCAGTCAAGAAA                           |
| 2R For312_PP5                                           | CGTCTCCCACAAGAAGCTTAAA                         |
| 2R For317_PP6                                           | TATCGACCATACTGTTCGAACTTT                       |
| 2R For423_PP6                                           | TACTTTGAGGGCACGCTTT                            |
| 3L For5_PP7                                             | GAGTGACAAGAAGCGTCTGC                           |
| 3L For36_PP7                                            | CACTCACCTCACGCAAT                              |
| 3L For61_PP8                                            | GAGGAACATACCCGGCATAAC                          |
| 3L For164_PP8                                           | ACGACTTCTGGTAGCTCTCTAA                         |
| 3R For27_PP9                                            | ACTCCCAAGTGCACAGTAATC                          |
| 3R For62_PP9                                            | CCTTGTGCTGGTCCACTTAT                           |
| X For67_PP10                                            | TTGTACTCCTCGATGAAGCTG                          |
| X For85_PP10                                            | GCCTTAATTGTCCGCAGATTG                          |
| <b>Primers for RNAi mediated Knockdown</b>              |                                                |
| EGFP_F                                                  | taatacgactcactataggggaCTACGGCGTGCAGTGCTTCA     |
| EGFP_R                                                  | taatacgactcactataggggaCTACGGCGTGCAGTGCTTCA     |
| HP1.F1                                                  | taatacgactcactataggggaGCCCTCTGGCAATAAATCAA     |
| HP1.R1                                                  | taatacgactcactataggggaCAGGATAGGCGCTCTTCGTA     |
| HP1.F2                                                  | taatacgactcactataggggaTGGAGTACTATCTGAAATGGAAGG |
| HP1.R2                                                  | taatacgactcactataggggaCGCCTCGTACTGCTGGATA      |
| Su(var)3-9_F1                                           | taatacgactcactataggggaTATTGAATGCGTTCGAGATGG    |
| Su(var)3-9_R1                                           | taatacgactcactataggggaAGAGGTTCTCGTAGGGGCACA    |
| ADD1 F1                                                 | taatacgactcactataggggaACCCCAACGTAGATCTGGTG     |
| ADD1 F2                                                 | taatacgactcactataggggaTGCTTGCGAGTATCTTGTGG     |
| ADD1 R1                                                 | taatacgactcactataggggaCAGAAGACGTAGGGGCAAGT     |
| ADD1 R2                                                 | taatacgactcactataggggaGCTCCATCTCGCGTAGGTAA     |
| <b>Primers for quantitativePCR</b>                      |                                                |
| ADD1_RT_fwd                                             | ACCCCAACGTAGATCTGGTG                           |
| ADD1_RT_rev                                             | CAGAAGACGTAGGGGCAAGT                           |
| nipped A fwd                                            | CAGCGGTCAAGTTGTTGAAC                           |
| nippedA rvs                                             | GACGGATATGCCGGACTTTG                           |
| light fwd                                               | GGTCACAATTTTCAGGGTGCT                          |
| light rvs                                               | AGAAGCGTCCGAAGCACTTA                           |

|                    |                           |
|--------------------|---------------------------|
| RpL15 fwd          | GACCTACTCGCCCGGATAA       |
| RpL15 rvs          | TACACCATGACTCTTCG         |
| DIP1_fwd           | GATCATCATCCGGTGCATCG      |
| DIP_rvs            | GATTCACGGCCGTTGTAC        |
| Cht3_fwd           | CGTGGGAGCATTTAGTTGGT      |
| Cht3_rvs           | ATGTACAGCCACCCAGAAGG      |
| CG40006 Fwd        | CTGTACTGCCCTTGTGCTGA      |
| CG40006 rvs        | TGTGACTGAAGCGGCTAATG      |
| Intergenic_fwd     | AATTGCATCGCAACACAATGAG    |
| Intergenic_rvs     | TCGTGAAATGTTTGCTACTGGAATA |
| dATF2_fwd          | CCCAGTAGCGCCAGTCTGA       |
| dATF2_rvs          | GTGGATAATGGCCTTCAATCG     |
| Ide_-fwd           | CTGAGCGGGGAAATCAATGCG     |
| Ide_rvs            | TTGCTGTAGGCATGGTCAGG      |
| CG5094_fwd         | CCGAGCACCTAGAAGTGGAT      |
| CG5094_rvs         | GCAATTTGCACGGTCATTTA      |
| CG15811_fwd        | TGCCCAGGCTTATTGTCTTC      |
| CG15811_rvs        | TTCGAGAGACTGCCCAAATC      |
| Rp49_fwd           | AAGAAGCGCACCAAGCACTTCATC  |
| Rp49_rvs           | TCTGTTGTGCGATACCCTTGGGCTT |
| <b>3C controls</b> |                           |
| 1K                 | AAGCCGCAGGAGTTTCTAAC      |
| 2K                 | CACGGGAAAACTACTGAAAG      |

**Table 4:** List of antibodies

| <b>Antibody against</b> | <b>Source</b>  | <b>Dilutions used</b>   |
|-------------------------|----------------|-------------------------|
| HP1a                    | DSHB (C1A9)    | 1:1000                  |
| Su(var)3-9              | Abcam ab4811   | 1:1000                  |
| Lamin                   | In-house (dm0) | 1:2000                  |
| Tubulin                 | Abcam ab6046   | 1:1000                  |
| H3K36me3                | Abcam ab9050   | 2-3µg per CHIP reaction |

**Table 5:** List of Next Generation Sequencing datasets of S2 cell line used from NCBI GEO database or modENCODE

| <b>Genomic Feature</b> | <b>Experimental technique</b> | <b>Source</b>                                                                                                                                      |
|------------------------|-------------------------------|----------------------------------------------------------------------------------------------------------------------------------------------------|
| H3K9me2                | ChIP seq                      | modENCODE_3953                                                                                                                                     |
| H3K9me3                | ChIP Chip                     | modENCODE_313                                                                                                                                      |
| H3K9ac                 | ChIP Chip                     | modENCODE_3765                                                                                                                                     |
| H3K27ac                | ChIP Chip                     | modENCODE_3757                                                                                                                                     |
| H3K4me1                | ChIP Chip                     | modENCODE_3760                                                                                                                                     |
| H3K4me3                | ChIP Chip                     | modENCODE_3761                                                                                                                                     |
| H3K36me3               | ChIP seq                      | modENCODE_4715                                                                                                                                     |
| HP1a                   | ChIP Chip                     | modENCODE_3777                                                                                                                                     |
| HP1b                   | ChIP Chip                     | modENCODE_3020                                                                                                                                     |
| HP1c                   | ChIP Chip                     | modENCODE_3291                                                                                                                                     |
| mod(mdg4)              | ChIP Chip                     | modENCODE_3789                                                                                                                                     |
| Su(Hw)                 | ChIP Chip                     | modENCODE_330                                                                                                                                      |
| CP190                  | ChIP Chip                     | modENCODE_3748                                                                                                                                     |
| GAF                    | ChIP Chip                     | modENCODE_3753                                                                                                                                     |
| BEAF32                 | ChIP on chip                  | modENCODE_3745                                                                                                                                     |
| CTCF                   | ChIP seq                      | modENCODE_2638                                                                                                                                     |
| dMES4                  | ChIP seq                      | GSE56101                                                                                                                                           |
| dADD1                  | ChIP seq                      | GSE56101                                                                                                                                           |
| Enhancers              | STARR-Seq                     | GSE40739                                                                                                                                           |
| Boundary Elements      | Bioinformatics prediction     | cdBEST ( <a href="http://e-portal.ccmb.res.in/e-space/rakeshmishra/cdBEST.html">http://e-portal.ccmb.res.in/e-space/rakeshmishra/cdBEST.html</a> ) |
| dMES4 KD               | RNA seq                       | GSM1376614/15                                                                                                                                      |
| RNA Pol II             | ChIP seq                      | modENCODE_329                                                                                                                                      |
